# Supplementary material for: A Tissue Paper/Hydrogel Composite Light-Responsive Biomimetic Actuator Fabricated by In Situ Polymerization
Source: MDPI journal article supplement (doi:10.3390/polym14245454), 2022-12-13
Supplement: s1 [file s1]

Supplementary Information for:

## **A Tissue Paper/Hydrogel Composite Light-Responsive Biomimetic Actuator Fabricated by In-Situ Polymerization**

Qijun Wu <sup>1,#</sup>, Chao Ma <sup>2,#</sup>, Lian Chen <sup>1</sup>, Ye Sun <sup>2</sup>, Xianshuo Wei <sup>1</sup>, Chunxin Ma <sup>2,4\*</sup>, Hongliang Zhao<sup>4</sup>, Xiuling Yang <sup>1</sup>, Xiaofan Ma <sup>1</sup>, Chunmei Zhang <sup>3,\*</sup> and Gaigai Duan <sup>1,\*</sup>

<sup>1</sup> Jiangsu Co-Innovation Center of Efficient Processing and Utilization of Forest Resources, International Innovation Center for Forest Chemicals and Materials, College of Materials Science and Engineering, Nanjing Forestry University, Nanjing 210037, China

<sup>2</sup> State Key Laboratory of Marine Resource Utilization in South China Sea, Hainan University, Haikou 570228, China

<sup>3</sup> Institute of Materials Science and Devices, School of Materials Science and Engineering, Suzhou University of Science and Technology, Suzhou 215009, China

<sup>4</sup> Key Laboratory of quality safe evaluation and research of degradable material for State Market Regulation, Products Quality Supervision and Testing Institute of Hainan Province, Haikou 570203, China

\* Corresponding author: machunxin@hainanu.edu.cn (C. Ma); cmzhang@usts.edu.cn (C. Zhang); duangaigai@njfu.edu.cn (G. Duan).

# These authors contributed equally to this work.

## Supplementary Figures

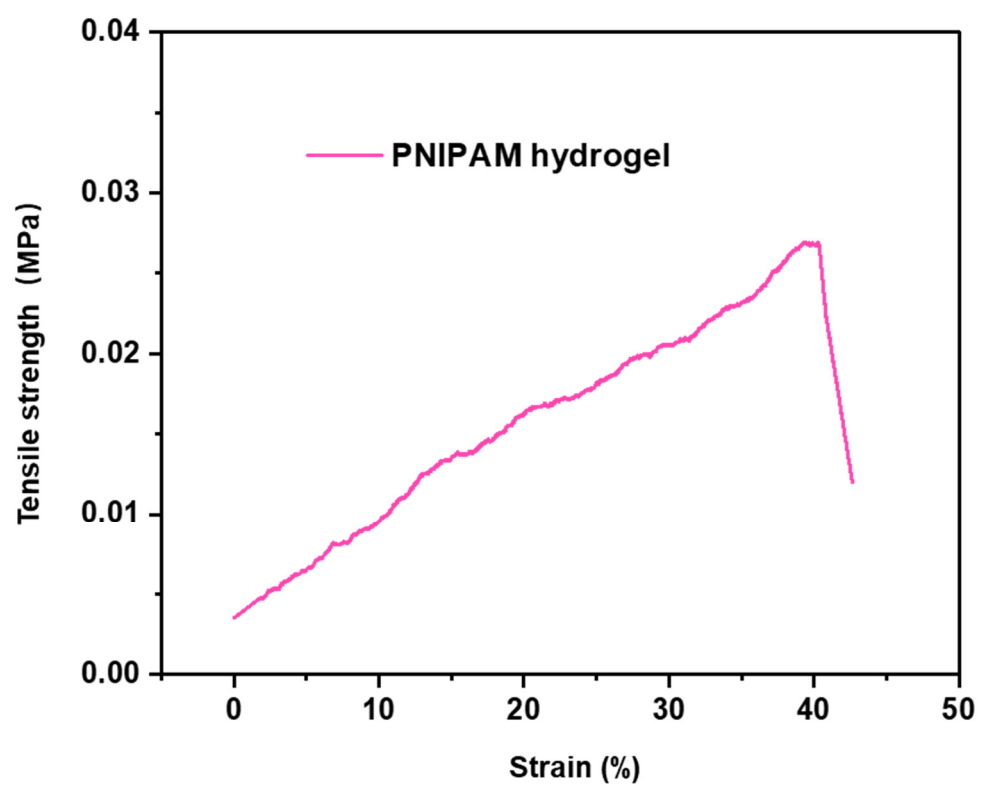

**Figure S1.** Mechanical property of the PNIPAM hydrogel.

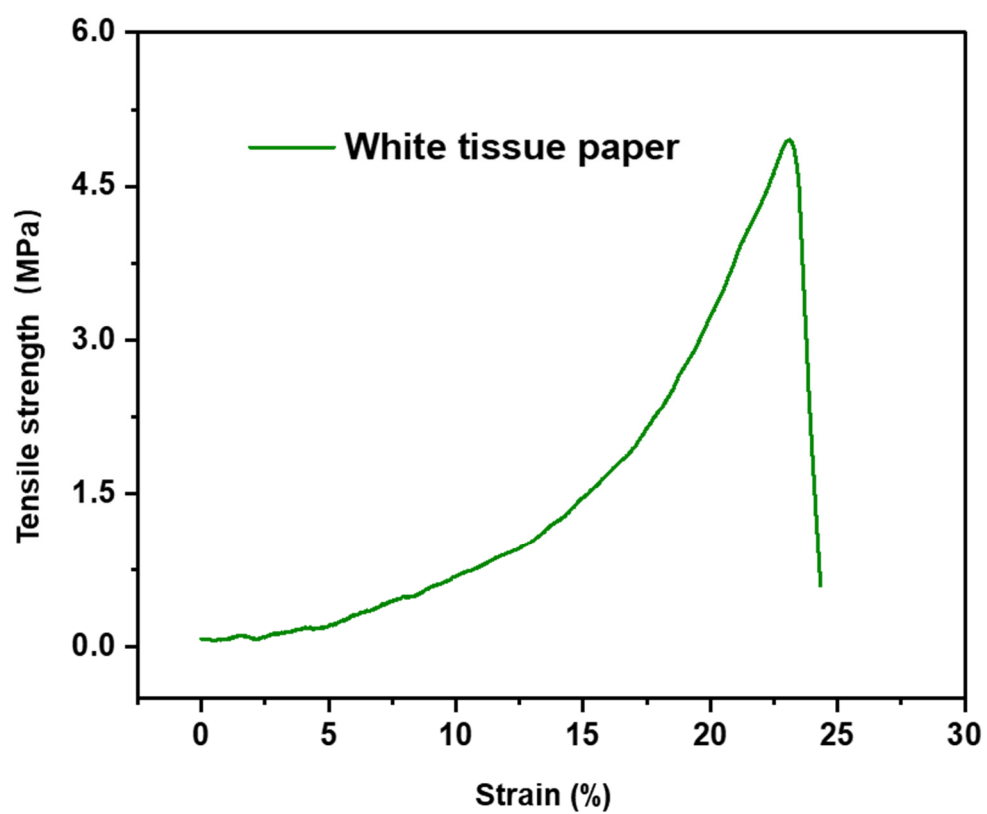

**Figure S2.** Mechanical property of the original white tissue paper.

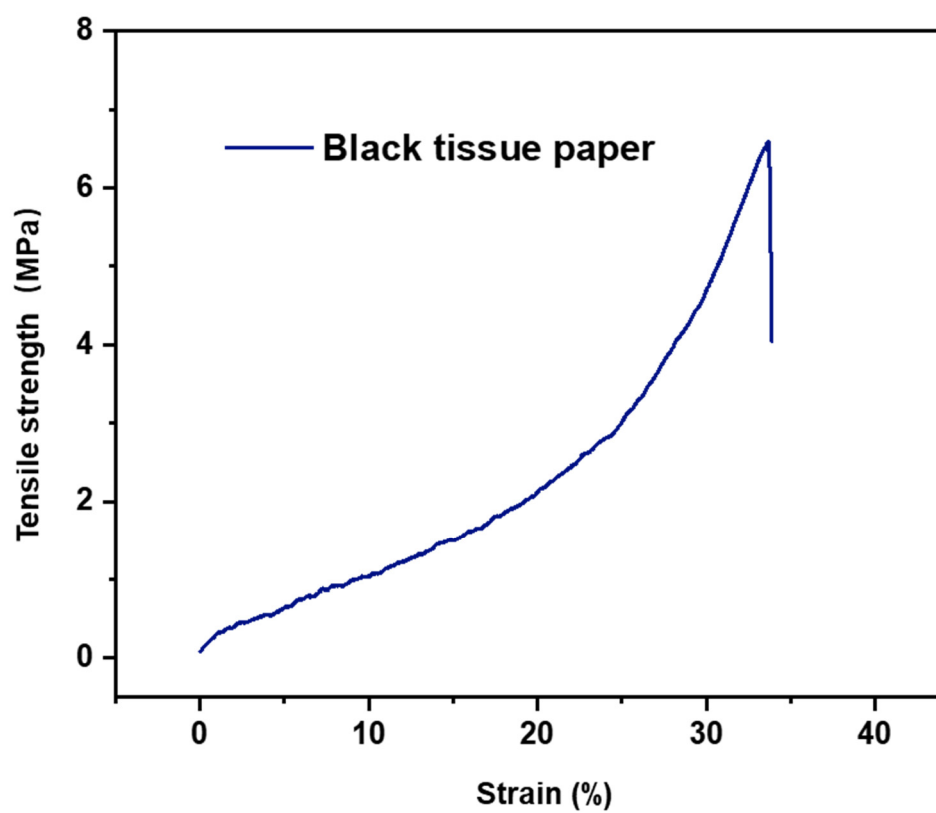

**Figure S3.** Mechanical property of the original black tissue paper dyed by the printer.

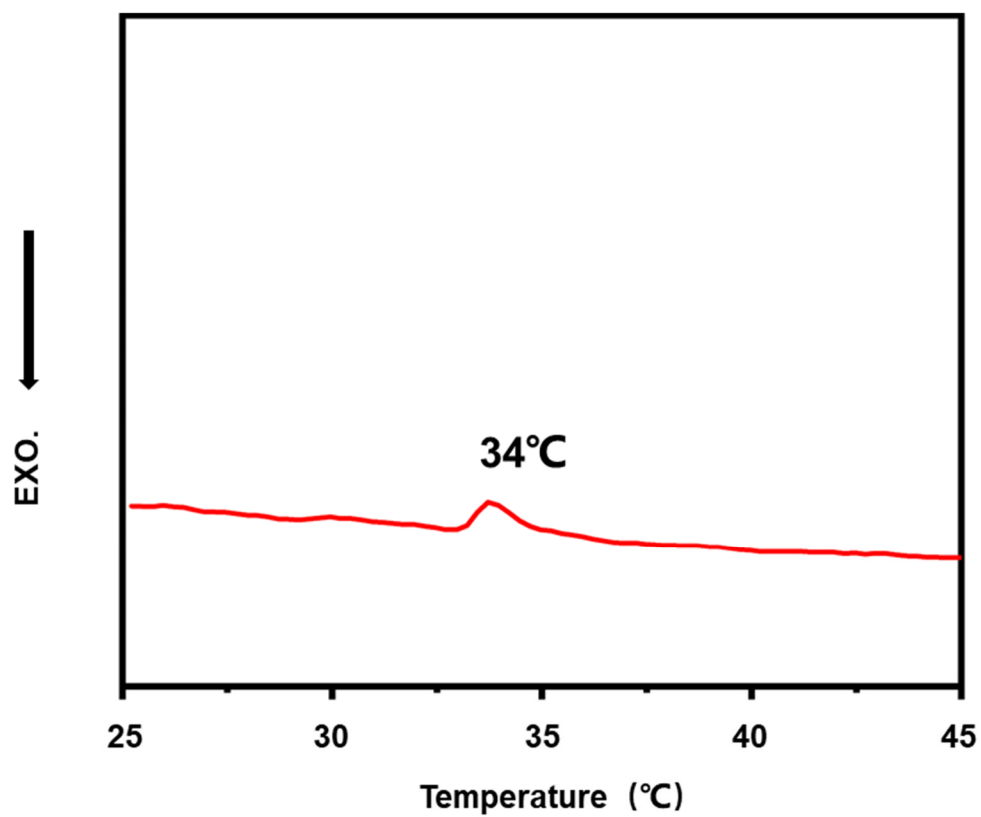

**Figure S4.** The DSC curve of the PNIPAM hydrogel.

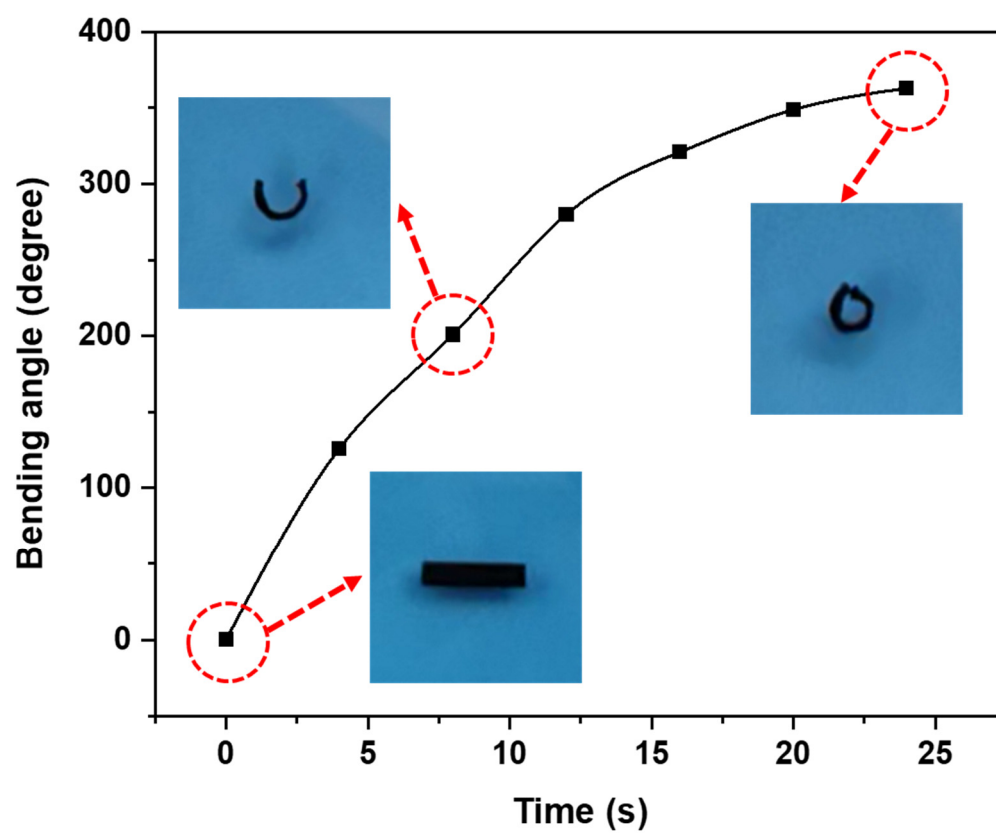

**Figure S5.** The bending process of the [tissue paper](#)/hydrogel composite actuator under a 45 °C warm water.

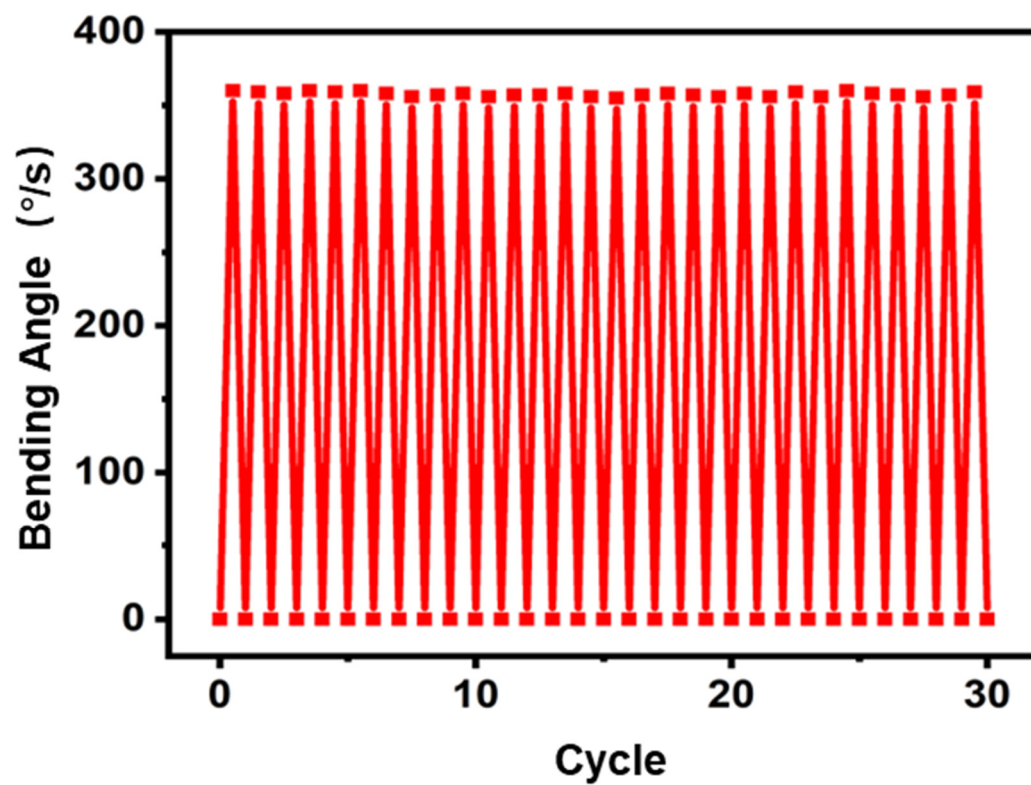

**Figure S6.** The bending-recovering cycle performance test of the [tissue paper](#)/PNIPAM hydrogel composite actuator.

### Supplementary Movies

**Movie S1.** Bending-recovering process of the composite actuator under an area irradiation (with  $3.5 \text{ W/cm}^2$  intensity of an 808 nm laser lamp).

**Movie S2.** Folding-recovering process of the composite actuator under a point irradiation (with a 0.2 cm of spot diameter and 2 W of power by an 808 nm laser lamp).

**Movie S3.** The remotely-controlled light-responsive grabbing behavior of the bio-mimetic “paw” based on the composite actuator under an area irradiation (with  $3.5 \text{ W/cm}^2$  intensity of an 808 nm laser lamp).

**Movie S4.** The remotely-controlled light-responsive finger-folding performance of the bio-mimetic “hand” based on the composite actuator under a point irradiation (with a 0.2 cm of spot diameter and 2 W of power by an 808 nm laser lamp,  $63.9 \text{ W/cm}^2$ ).
