# Supplementary material for: A Tissue Paper/Hydrogel Composite Light-Responsive Biomimetic Actuator Fabricated by In Situ Polymerization
Source: Polymers (Basel). 2022 Dec 13;14(24):5454. doi: 10.3390/polym14245454 (PMC9785941; doi:10.3390/polym14245454)
Supplement: Supplementary file 1 [file polymers-14-05454-s001.zip]

Archive with 5 entries (5 files):
- Movie S1.mp4
- Movie S2.mp4
- Movie S3.mp4
- Movie S4.mp4
- Revised Supporting information.pdf
